# Supplementary material for: Pragmatic randomised controlled trial of very early etanercept and MTX versus MTX with delayed etanercept in RA: the VEDERA trial
Source: PubMed Central journal article supplement — Ann Rheum Dis. 2020 Jan 29;79(4):464–71. doi: 10.1136/annrheumdis-2019-216539 (PMC7147179; doi:10.1136/annrheumdis-2019-216539), 2020-01-29

## Online supplementary file

### Methods

#### Statistical analysis

##### Analysis populations

Efficacy analyses were conducted in the full analysis set, meeting the requirements of the intention-to-treat principle. The main analysis of the primary endpoint was supplemented by a sensitivity analysis restricted to the per protocol population that comprised all patients in the full analysis set with primary endpoint data available and no major protocol violations. Safety analyses were conducted in the safety population. See supplementary table S1 for details of each analysis population.

##### Primary outcome

The primary analysis was conducted using a Pearson's Chi-square test. The point estimate and 95% confidence interval for the odds of achieving clinical remission is reported.

A number of sensitivity analyses of the primary outcome were conducted. These consisted of available case analysis, best case (response assumed if missing for reasons other than lack of efficacy) analysis, worst case (non-response assumed if missing for reasons other than lack of efficacy) analysis. We also carried forward the last available on-treatment observation. Additional sensitivity analyses made different assumptions about the missing data in each treatment arm: we assumed all patients with missing data in the early ETN arm would not have achieved remission, while all such patients in the delayed ETN would have achieved remission (designated 'near split' imputation) or vice versa (designated 'far split' imputation). These were designed to test the impacts of the most extreme possible deviations from the missing at random assumption required for multiple imputation. In addition, the primary analysis was repeated in the per protocol set.

##### Secondary outcomes

Proportions of patients achieving remission, ACR or EULAR response at 96 weeks were compared between groups using Pearson's Chi-squared tests. Changes in continuous variables over time were compared between groups using a linear multilevel modelling approach, mirroring the mixed between-within ANOVA model but with less restrictive assumptions about covariance structure. Optimal covariance pattern was identified using Akaike Information Criterion (AIC) values after inspection of correlations between repeated observations. An autoregressive structure was found to be optimal. Robust standard errors were used to address minor deviations from normality in the

residuals. Following an overall test of a significant difference between the groups over time, comparisons were then made between groups at each time-point. Severely skewed variables were analysed using quantile regression; this was required for the ultrasound variables and total Sharp score which were heavily right-skewed. The analysis plan specified that median regression would be used; however, because of the high prevalence of zero scores for power Doppler and erosion, differences between groups at the 90<sup>th</sup> percentile have been presented instead.

Time to sustained remission was compared between groups using logrank tests.

The Holm correction (modified Bonferroni) was used on a family-wise basis to control for multiple comparisons of secondary outcomes. This set the critical P-value for testing significance at the 5% level to  $p < 0.00088$ . The correction included secondary outcomes but excluded exploratory outcomes; by definition, exploratory analyses are considered hypothesis generating rather than confirmatory.

All analyses have been conducted in Stata v15.

### **Rasch analysis of Patient Reported Outcomes**

Quasi-interval-scaled scores were obtained for HAQ-DI, RAQoL and RAWIS using analysis of fit to the Rasch model. For HAQ scores, scores were converted using a published conversion table. For RAQoL and RAWIS, analysis in RUMM2030 was used to test for overall fit to the model, evidence of local dependency, differential item functioning by age, sex and timepoint, multidimensionality and targeting. After adopting a testlet approach, both scales were found to fit the model with no evidence of specific issues of misfit, although targeting was relatively poor at post-baseline visits as many patients' scores were at the minimum possible. Having demonstrated absence of differential item functioning by timepoint, estimates in the full dataset were anchored to the solution obtained at baseline, where targeting was best (and threshold estimates were therefore most accurate).

### **Other planned analyses**

Proportions of patients in each arm requiring escalation of therapy to triple therapy and to biologic therapy have been summarised descriptively, as has cumulative IM steroid dose up to week 48.

Comparisons have been made between the response in the early ETN group over the first 24 weeks, and the response in the delayed ETN group over the 24-48 period in those who were escalated to etanercept at week 24.

### **Unplanned analyses**

To illustrate trends in disease activity, mean DAS28-ESR (95% CI) has been plotted over time in each group; mean (SD) DAS28-ESR and change in DAS28-ESR has been tabulated at each of the primary and secondary time-points.

Because all medians were 0 at all time-points in both groups for US power Doppler and erosion scores, quantile regression analysis has been performed in which the 90<sup>th</sup> percentile is the target rather than the (pre-specified) median (50<sup>th</sup> percentile).

Area under the curve DAS28-ESR has been calculated during the first 48 weeks and over the whole 96 weeks of the trial. To calculate this, values obtained at 12-weekly intervals were used.

In response to recent interest in sustained remission, and alternative definitions of remission, with respect to predicting successful cessation of biologic therapy, sustained remission (defined as remission at both the current and immediately preceding 12-weekly visit) has been calculated at weeks 48 and 96 for DAS28 remission (<2.6), deep DAS28-ESR remission (<1.98), Boolean remission (tender joint count ≤ 1 & swollen joint count ≤ 1 & CRP ≤ 10 mg/L & patient disease activity VAS ≤ 10mm). For calculation of Boolean remission, 28 joint counts were augmented with assessments of the ankles and MTPs, as recommended by the developers of the criteria. Odds ratios and 95% confidence intervals have been calculated for the odds of achieving DAS28-ESR remission at week 96 according to the level of remission at week 48, in the group as a whole (irrespective of treatment group). The odds of achieving DAS28-ESR remission at week 96 according to DAS28 remission status at week 48 have also been calculated within each treatment arm, and within a subgroup of MTX-TT; MTX-TTb (delayed ETN arm) defined by ETN escalation status at week 24.

### Handling of missing data

Missing values at baseline were imputed using screening values, where available.

For response variables (including the primary outcome) patients who discontinued study medication for lack of efficacy were considered non-responders from that point forward.

In all other instances, missing data were addressed using multiple imputation by chained equations. Predictive mean matching (10 nearest neighbours) was used to impute all variables. We imputed 50 datasets and combined the results of our analyses according to Rubin's rules.

Imputation models were as follows:

#### **For all disease activity outcomes that included 28 joint counts:**

[SJC28, TJC28, lnCRP, lnESR, physician global VAS, pain VAS, disease activity VAS, early morning stiffness and HAQ-DI] at 0, 12, 24, 36\*, 48, 72 & 96 weeks, age at baseline, sex, symptom duration, treatment group and whether or not the patient was escalated to etanercept at week 24

\*Excluding HAQ-DI which was not collected at week 36

#### **For all disease activity outcomes that included 44 swollen joint count and RAI:**

[SJC44, RAI, lnCRP, lnESR, physician global VAS, pain VAS, disease activity VAS, early morning stiffness and HAQ-DI] at 0, 12, 24, 36\*, 48, 72 & 96 weeks, age at baseline, sex, symptom duration, treatment group and whether or not the patient was escalated to etanercept at week 24

\*Excluding HAQ-DI which was not collected at week 36

**For all patient-reported outcomes:**

[HAQ-DI, RAQoL, EQ5D, RAWIS, DAS28-ESR, disease activity VAS, early morning stiffness] at 0, 12, 24, 48, 72 & 96 weeks, age at baseline, sex, symptom duration, whether or not the patient was in paid employment at baseline (relevant for RAWIS), DAS28-ESR, treatment group and whether or not the patient was escalated to etanercept at week 24

**For all imaging outcomes:**

[InCRP, early morning stiffness, SJC28, TJC28, InESR, disease activity VAS, physician global VAS, total GS score, total PD score, total erosion score, total tenosynovitis score, total osteophyte score] at weeks 0, 12, 24 & 48, [InCRP, SJC28, TJC28, InESR, disease activity VAS] at week 36, [total modified Sharp score] at weeks 0, 48 & 96, age at baseline, sex, symptom duration, treatment group and whether or not the patient was escalated to etanercept at week 24

**Missing visit patterns**

Visits that occurred more than 2 weeks from the scheduled date were considered to be missing and data were imputed as detailed above. This was necessary for six visits in six patients. Two were at the primary endpoint 48 weeks, three were at 24 weeks, one was at week 96.

## Results

**Table S1: Analysis populations, screening criteria and per protocol exclusions**

| <b>Analysis population</b>                                                                                  | <b>All</b>               | <b>ETN+MTX</b>            | <b>MTX-TT</b>            |
|-------------------------------------------------------------------------------------------------------------|--------------------------|---------------------------|--------------------------|
| Screening population                                                                                        | 177                      | 60                        | 60                       |
| Full analysis set                                                                                           | 120                      | 60                        | 60                       |
| Safety population                                                                                           | 120                      | 60                        | 60                       |
| Per protocol efficacy                                                                                       | 84/120<br>(70%)          | 45/60<br>(75%)            | 39/60<br>(65%)           |
| <b>In/exclusion criteria met<br/>(in screening population)</b>                                              | <b>Failed<br/>(n=57)</b> | <b>ETN+MTX<br/>(n=60)</b> | <b>MTX-TT<br/>(n=60)</b> |
| IN: Patient aged 18-80                                                                                      | 57                       | 60                        | 60                       |
| IN: 2010 ACR/EULAR criteria                                                                                 | 57                       | 60                        | 60                       |
| IN: Symptom onset <12months                                                                                 | 54                       | 60                        | 60                       |
| IN: Active disease                                                                                          | 49                       | 60                        | 60                       |
| IN: ACPA or PD positive                                                                                     | 56                       | 60                        | 60                       |
| IN: No previous DMARDs                                                                                      | 57                       | 60                        | 60                       |
| IN: Use contraception                                                                                       | 57                       | 60                        | 60                       |
| EX: Corticosteroid IA/IM                                                                                    | 0                        | 0                         | 0                        |
| EX: Oral steroid use                                                                                        | 1                        | 0                         | 0                        |
| EX: NSAID use or change                                                                                     | 2                        | 0                         | 0                        |
| EX: Imaging                                                                                                 | 19                       | 0                         | 0                        |
| EX: Pregnant/breastfeeding                                                                                  | 0                        | 0                         | 0                        |
| EX: Other contraindications*                                                                                | 16                       | 1                         | 0                        |
| EX: Medical history                                                                                         | 7                        | 0                         | 0                        |
| EX: Planned surgery                                                                                         | 0                        | 0                         | 0                        |
| <b>Reason for exclusion from per protocol efficacy population<br/>(in full analysis set)</b>                | <b>All<br/>(n=120)</b>   | <b>ETN+MTX<br/>(n=60)</b> | <b>MTX-TT<br/>(n=60)</b> |
| Received prohibited concomitant medications                                                                 | 4                        | 0                         | 4                        |
| Did not meet inclusion criteria (bar contraception) or met exclusion criteria (bar safety-related criteria) | 7                        | 4                         | 3                        |
| Study treatment(s) was/were paused for >28 days                                                             | 1                        | 0                         | 1                        |
| Did not receive randomised treatment**                                                                      | 2                        | 0                         | 2                        |
| Had >1 visit (up to week 48) outside the 7 day window                                                       | 3                        | 2                         | 1                        |
| Withdrew from study treatment for any reason                                                                | 16                       | 8                         | 8                        |
| Did not have primary endpoint data available                                                                | 3                        | 1                         | 2                        |

\*The patient in ETN+MTX who met exclusion criteria for other contraindications was randomised in error before being discovered to have a positive quantiferon test; they were withdrawn after 1 dose of ETN

\*\*Two patients in the delayed ETN group were not fully escalated to ETN despite being eligible; one declined, another felt unwell after 1 dose and discontinued

**Table S2: Primary outcome DAS28-ESR remission (<2.6)**

Population: Full analysis set

| <b>Visit</b> | <b>ETN+MTX (n=60)</b> | <b>MTX-TT (n=60)</b> | <b>Odds ratio (95% CI)</b> | <b>Chi-square, P value</b> |
|--------------|-----------------------|----------------------|----------------------------|----------------------------|
| Week 12      | 39%                   | 17%                  | 3.18 (1.35, 7.50)          | Chi-sq=7.0 p=0.008         |
| Week 24      | 38%                   | 33%                  | 1.25 (0.58, 2.70)          | Chi-sq=0.3 p=0.565         |
| Week 48      | 52%                   | 38%                  | 1.73 (0.81, 3.70)          | Chi-sq=2.0 p=0.160         |
| Week 96      | 47%                   | 42%                  | 1.20 (0.56, 2.60)          | Chi-sq=0.2 p=0.641         |

Proportions estimated following multiple imputation. CI=confidence interval

**Table S3: Primary outcome DAS28-ESR remission (<2.6) at 48 weeks - sensitivity analyses**

Population: Full analysis set (with exception of per protocol analysis, conducted in per protocol set)

| Visit         | ETN+MTX (n=60) | MTX-TT (n=60) | Odds ratio (95% CI) | Chi-square, P value |
|---------------|----------------|---------------|---------------------|---------------------|
| Best case     | 63% (38/60)    | 50% (30/60)   | 1.73 (0.83, 3.58)   | Chi-sq=2.2 p=0.140  |
| Worst case    | 50% (30/60)    | 33% (20/60)   | 2.00 (0.96, 4.18)   | Chi-sq=3.4 p=0.063  |
| Split: near   | 50% (30/60)    | 50% (30/60)   | 1.00 (0.49, 2.05)   | Chi-sq=0.0 p=1.000  |
| Split: far    | 63% (38/60)    | 33% (20/60)   | 3.45 (1.63, 7.32)   | Chi-sq=11.0 p=0.001 |
| LOCF          | 52% (31/60)    | 35% (21/60)   | 1.99 (0.95, 4.13)   | Chi-sq=3.4 p=0.065  |
| Complete case | 58% (30/52)    | 40% (20/50)   | 2.05 (0.93, 4.50)   | Chi-sq=3.2 p=0.073  |
| Per protocol  | 58% (26/45)    | 44% (17/39)   | 1.77 (0.74, 4.21)   | Chi-sq=1.7 p=0.194  |

Best case imputation: remission assumed if missing. Worst case imputation: non-remission assumed if missing. Split imputation: if 'near', non-remission assumed for ETN+MTX, remission for MTX-TT. If 'far': remission assumed for ETN+MTX, non-remission for MTX-TT. CI=confidence interval; LOCF=last on-treatment observation carried forward

**Table S4: Secondary outcome DAS28-CRP(<2.6)**

Population: Full analysis set

| Visit   | ETN+MTX (n=60) | MTX-TT (n=60) | Odds ratio (95% CI) | Chi-square, P value |
|---------|----------------|---------------|---------------------|---------------------|
| Week 12 | 53%            | 32%           | 2.46 (1.17, 5.20)   |                     |
| Week 24 | 54%            | 48%           | 1.27 (0.60, 2.67)   |                     |
| Week 48 | 75%            | 64%           | 1.70 (0.74, 3.87)   |                     |
| Week 96 | 61%            | 59%           | 1.09 (0.49, 2.41)   | Chi-sq=0.0 p=0.837  |

Proportions estimated following multiple imputation. CI=confidence interval

**Table S5: Secondary outcome DAS44-ESR remission (<1.6)**

Population: Full analysis set

| Visit   | ETN+MTX (n=60) | MTX-TT (n=60) | Odds ratio (95% CI) | Chi-square, P value |
|---------|----------------|---------------|---------------------|---------------------|
| Week 12 | 31%            | 13%           | 2.86 (1.13, 7.23)   |                     |
| Week 24 | 40%            | 30%           | 1.57 (0.72, 3.43)   |                     |
| Week 48 | 54%            | 39%           | 1.86 (0.87, 4.00)   |                     |
| Week 96 | 46%            | 44%           | 1.07 (0.50, 2.32)   | Chi-sq=0.0 p=0.858  |

Proportions estimated following multiple imputation. CI=confidence interval

**Table S6: Secondary outcome DAS44-CRP remission (<1.6)**

Population: Full analysis set

| Visit   | ETN+MTX (n=60) | MTX-TT (n=60) | Odds ratio (95% CI) | Chi-square, P value |
|---------|----------------|---------------|---------------------|---------------------|
| Week 12 | 47%            | 27%           | 2.46 (1.14, 5.33)   |                     |
| Week 24 | 47%            | 34%           | 1.74 (0.80, 3.79)   |                     |
| Week 48 | 61%            | 53%           | 1.38 (0.65, 2.94)   |                     |
| Week 96 | 51%            | 51%           | 1.03 (0.47, 2.23)   | Chi-sq=0.0 p=0.946  |

Proportions estimated following multiple imputation. CI=confidence interval

**Table S7: Table of DAS scores and changes at each visit (unplanned analysis)**

Population: Full analysis set

| Outcome           | Mean score at visit (SD) |               | Mean change from baseline (SD) |               |
|-------------------|--------------------------|---------------|--------------------------------|---------------|
|                   | ETN+MTX (n=60)           | MTX-TT (n=60) | ETN+MTX (n=60)                 | MTX-TT (n=60) |
| DAS28-ESR week 12 | 3.06 (1.16)              | 3.82 (1.23)   | -2.71 (1.40)                   | -1.74 (1.36)  |
| week 24           | 3.15 (1.50)              | 3.42 (1.37)   | -2.62 (1.75)                   | -2.14 (1.36)  |
| week 48           | 2.69 (1.19)              | 2.90 (1.07)   | -3.08 (1.46)                   | -2.65 (1.45)  |
| week 96           | 2.69 (1.29)              | 2.92 (1.24)   | -3.08 (1.67)                   | -2.64 (1.72)  |
| DAS28-CRP week 12 | 2.64 (1.20)              | 3.24 (1.24)   | -2.57 (1.38)                   | -1.67 (1.33)  |
| week 24           | 2.76 (1.35)              | 2.96 (1.34)   | -2.46 (1.67)                   | -1.94 (1.37)  |
| week 48           | 2.24 (1.16)              | 2.39 (0.90)   | -2.98 (1.47)                   | -2.52 (1.43)  |
| week 96           | 2.45 (1.05)              | 2.44 (1.07)   | -2.76 (1.51)                   | -2.46 (1.66)  |
| DAS44-ESR week 12 | 1.91 (0.80)              | 2.44 (0.83)   | -1.81 (1.00)                   | -1.21 (0.93)  |
| week 24           | 1.99 (1.05)              | 2.21 (0.93)   | -1.73 (1.23)                   | -1.45 (0.97)  |
| week 48           | 1.61 (0.84)              | 1.87 (0.74)   | -2.11 (1.05)                   | -1.78 (0.98)  |
| week 96           | 1.69 (0.93)              | 1.81 (0.85)   | -2.02 (1.14)                   | -1.84 (1.14)  |
| DAS44-CRP week 12 | 1.71 (0.82)              | 2.17 (0.84)   | -1.75 (1.00)                   | -1.18 (0.92)  |
| week 24           | 1.80 (0.98)              | 2.00 (0.92)   | -1.65 (1.20)                   | -1.34 (0.97)  |
| week 48           | 1.40 (0.84)              | 1.63 (0.69)   | -2.06 (1.06)                   | -1.71 (0.98)  |
| week 96           | 1.58 (0.84)              | 1.59 (0.81)   | -1.88 (1.08)                   | -1.76 (1.15)  |

Means and SDs estimated following multiple imputation. SD=Standard deviation

**Table S8: Proportion in DAS28ESR remission or LDA (DAS28ESR≤3.2) (unplanned analysis)**

Population: Full analysis set

| Visit   | ETN+MTX (n=60) | MTX-TT (n=60) | Odds ratio (95% CI) |
|---------|----------------|---------------|---------------------|
| Week 12 | 57%            | 37%           | 2.27 (1.09, 4.75)   |
| Week 24 | 62%            | 54%           | 1.42 (0.66, 3.03)   |
| Week 48 | 72%            | 62%           | 1.59 (0.70, 3.59)   |
| Week 96 | 65%            | 61%           | 1.17 (0.53, 2.59)   |

CI=confidence interval; ETN=etanercept; MTX=methotrexate; TT=treat-to-target

**Table S9: Proportion in ACR/EULAR Boolean remission (unplanned analysis)**

Population: Full analysis set

| Visit   | ETN+MTX (n=60) | MTX-TT (n=60) | Odds ratio (95% CI) |
|---------|----------------|---------------|---------------------|
| Week 12 | 20%            | 13%           | 1.59 (0.59, 4.25)   |
| Week 24 | 17%            | 12%           | 1.54 (0.54, 4.40)   |
| Week 48 | 29%            | 23%           | 1.37 (0.59, 3.17)   |
| Week 96 | 29%            | 26%           | 1.14 (0.50, 2.62)   |

CI=confidence interval; ETN=etanercept; MTX=methotrexate; TT=treat-to-target

**Table S10: Secondary outcome time to sustained remission**

Population: Full analysis set

| Sustained remission | Proportion of patients |                |               | Survival time 25th percentile |               | Logrank chi-square, P value |
|---------------------|------------------------|----------------|---------------|-------------------------------|---------------|-----------------------------|
|                     | All (n=120)            | ETN+MTX (n=60) | MTX-TT (n=60) | ETN+MTX (n=60)                | MTX-TT (n=60) |                             |
| DAS28-ESR           | 34% (41/120)           | 42% (25/60)    | 27% (16/60)   | 24                            | 36            | Chi-sq=4.46 p=0.035         |
| DAS28-CRP           | 54% (65/120)           | 57% (34/60)    | 52% (31/60)   | 13                            | 24            | Chi-sq=2.06 p=0.151         |
| DAS44-ESR           | 33% (40/120)           | 38% (23/60)    | 28% (17/60)   | 24                            | 36            | Chi-sq=2.48 p=0.115         |
| DAS44-CRP           | 46% (55/120)           | 48% (29/60)    | 43% (26/60)   | 13                            | 24            | Chi-sq=1.44 p=0.230         |
| SDAI                | 26% (31/120)           | 33% (20/60)    | 18% (11/60)   | 24                            | -             | Chi-sq=4.38 p=0.036         |
| CDAI                | 28% (33/120)           | 33% (20/60)    | 22% (13/60)   | 24                            | -             | Chi-sq=3.07 p=0.080         |

Note that because fewer than 50% of patients achieved sustained remission for the majority of remission definitions, medians and 75th percentiles could not be calculated for survival time; only the 25th percentiles are presented, where it was possible to calculate these. CRP=C-reactive protein; ESR=erythrocyte sedimentation rate.

**Table S11: Secondary outcome EULAR moderate or good response**

Population: Full analysis set

| Visit   | ETN+MTX (n=60) | MTX-TT (n=60) | Odds ratio (95% CI) | Chi-square, P value |
|---------|----------------|---------------|---------------------|---------------------|
| Week 12 | 92%            | 75%           | 3.59 (1.21, 10.66)  |                     |
| Week 24 | 88%            | 86%           | 1.18 (0.37, 3.77)   |                     |
| Week 48 | 94%            | 89%           | 1.88 (0.43, 8.18)   |                     |
| Week 96 | 94%            | 87%           | 2.39 (0.58, 9.82)   | Chi-sq=1.5 p=0.226  |

Proportions estimated following multiple imputation. CI=confidence interval

**Table S12: Secondary outcome EULAR good response**

Population: Full analysis set

| Visit   | ETN+MTX (n=60) | MTX-TT (n=60) | Odds ratio (95% CI) | Chi-square, P value |
|---------|----------------|---------------|---------------------|---------------------|
| Week 12 | 55%            | 33%           | 2.46 (1.17, 5.17)   |                     |
| Week 24 | 61%            | 49%           | 1.63 (0.77, 3.46)   |                     |
| Week 48 | 70%            | 61%           | 1.48 (0.66, 3.31)   |                     |
| Week 96 | 63%            | 61%           | 1.09 (0.50, 2.39)   | Chi-sq=0.0 p=0.832  |

Proportions estimated following multiple imputation. CI=confidence interval



**Table S13: Secondary outcome ACR20 response**

Population: Full analysis set

| Visit   | ETN+MTX (n=60) | MTX-TT (n=60) | Odds ratio (95% CI) | Chi-square, P value |
|---------|----------------|---------------|---------------------|---------------------|
| Week 12 | 75%            | 55%           | 2.45 (1.10, 5.46)   |                     |
| Week 24 | 69%            | 67%           | 1.13 (0.50, 2.54)   |                     |
| Week 48 | 83%            | 73%           | 1.79 (0.69, 4.60)   |                     |
| Week 96 | 77%            | 72%           | 1.28 (0.52, 3.16)   | Chi-sq=0.3 p=0.591  |

Proportions estimated following multiple imputation. CI=confidence interval

**Table S14: Secondary outcome ACR50 response**

Population: Full analysis set

| Visit   | ETN+MTX (n=60) | MTX-TT (n=60) | Odds ratio (95% CI) | Chi-square, P value |
|---------|----------------|---------------|---------------------|---------------------|
| Week 12 | 66%            | 36%           | 3.46 (1.60, 7.50)   |                     |
| Week 24 | 53%            | 47%           | 1.29 (0.60, 2.76)   |                     |
| Week 48 | 69%            | 56%           | 1.78 (0.81, 3.92)   |                     |
| Week 96 | 64%            | 55%           | 1.45 (0.65, 3.21)   | Chi-sq=0.8 p=0.362  |

Proportions estimated following multiple imputation. CI=confidence interval

**Table S15: Secondary outcome ACR70 response**

Population: Full analysis set

| Visit   | ETN+MTX (n=60) | MTX-TT (n=60) | Odds ratio (95% CI) | Chi-square, P value |
|---------|----------------|---------------|---------------------|---------------------|
| Week 12 | 36%            | 21%           | 2.03 (0.88, 4.67)   |                     |
| Week 24 | 42%            | 28%           | 1.90 (0.85, 4.22)   |                     |
| Week 48 | 58%            | 44%           | 1.76 (0.82, 3.75)   |                     |
| Week 96 | 50%            | 42%           | 1.40 (0.64, 3.07)   | Chi-sq=0.7 p=0.397  |

Proportions estimated following multiple imputation. CI=confidence interval

**Table S16: Secondary outcome HAQ-DI score**

Population: Full analysis set

| Visit   | Mean change (95% CI) |                      | Difference (95% CI) | T value, P value | Overall F value, P value |
|---------|----------------------|----------------------|---------------------|------------------|--------------------------|
|         | ETN+MTX (n=60)       | MTX-TT (n=60)        |                     |                  |                          |
| Week 12 | -0.60 (-0.70, -0.50) | -0.41 (-0.51, -0.32) | 0.19 (0.04, 0.33)   | t=2.57, p=0.010  | F=1.79, p=0.148          |
| Week 24 | -0.59 (-0.71, -0.47) | -0.48 (-0.61, -0.36) | 0.11 (-0.07, 0.28)  | t=1.19, p=0.233  |                          |
| Week 48 | -0.65 (-0.77, -0.53) | -0.62 (-0.74, -0.50) | 0.03 (-0.14, 0.20)  | t=0.35, p=0.730  |                          |
| Week 96 | -0.63 (-0.75, -0.51) | -0.66 (-0.79, -0.52) | -0.02 (-0.20, 0.16) | t=-0.26, p=0.797 |                          |

Means estimated following multiple imputation. CI=Confidence interval; HAQ-DI=Health assessment questionnaire disability index

**Table S17: Secondary outcome HAQ-DI normalisation (HAQ-DI≤0.5)**

Population: Full analysis set

| Visit   | ETN+MTX (n=60) | MTX-TT (n=60) | Odds ratio (95% CI) | Chi-square, P value |
|---------|----------------|---------------|---------------------|---------------------|
| Week 12 | 56%            | 48%           | 1.36 (0.66, 2.80)   |                     |
| Week 24 | 59%            | 56%           | 1.13 (0.53, 2.39)   |                     |
| Week 48 | 63%            | 65%           | 0.93 (0.43, 2.05)   |                     |
| Week 96 | 65%            | 72%           | 0.72 (0.31, 1.66)   | Chi-sq=0.6 p=0.442  |

Proportions estimated following multiple imputation. CI=confidence interval

**Table S18: Secondary outcome EQ5D-3L**

Population: Full analysis set

| Visit   | Mean change (95% CI) |                   | Difference (95% CI)  | T value, P value | Overall F value, P value |
|---------|----------------------|-------------------|----------------------|------------------|--------------------------|
|         | ETN+MTX (n=60)       | MTX-TT (n=60)     |                      |                  |                          |
| Week 12 | 0.30 (0.24, 0.35)    | 0.19 (0.11, 0.26) | -0.11 (-0.20, -0.02) | t=-2.46, p=0.014 | F=0.40, p=0.751          |
| Week 24 | 0.32 (0.27, 0.36)    | 0.22 (0.15, 0.29) | -0.10 (-0.17, -0.02) | t=-2.58, p=0.010 |                          |
| Week 48 | 0.33 (0.27, 0.40)    | 0.27 (0.20, 0.35) | -0.06 (-0.15, 0.03)  | t=-1.39, p=0.165 |                          |
| Week 96 | 0.36 (0.31, 0.41)    | 0.29 (0.22, 0.36) | -0.06 (-0.14, 0.02)  | t=-1.58, p=0.114 |                          |

Means estimated following multiple imputation. CI=confidence interval ; EQ5D-3L=Euroqol health index (5 dimensions 3 levels)

**Table S19: Secondary outcome pain visual analogue scale (mm)**

Population: Full analysis set

| Visit   | Mean change (95% CI)    |                         | Difference (95% CI) | T value, P value | Overall F value, P value |
|---------|-------------------------|-------------------------|---------------------|------------------|--------------------------|
|         | ETN+MTX (n=60)          | MTX-TT (n=60)           |                     |                  |                          |
| Week 12 | -30.52 (-36.44, -24.60) | -21.51 (-27.82, -15.20) | 9.01 (0.30, 17.73)  | t=2.03, p=0.043  | F=1.76, p=0.152          |
| Week 24 | -25.42 (-32.29, -18.55) | -24.18 (-30.49, -17.88) | 1.24 (-8.02, 10.50) | t=0.26, p=0.793  |                          |
| Week 48 | -32.77 (-38.03, -27.51) | -32.84 (-38.62, -27.07) | -0.07 (-7.89, 7.75) | t=-0.02, p=0.986 |                          |
| Week 96 | -32.79 (-38.45, -27.13) | -26.47 (-33.66, -19.27) | 6.32 (-2.85, 15.50) | t=1.35, p=0.177  |                          |

Means estimated following multiple imputation. CI=Confidence interval

**Table S20: Secondary outcome disease activity visual analogue scale (mm)**

Population: Full analysis set

| Visit   | Mean change (95% CI)    |                         | Difference (95% CI) | T value, P value | Overall F value, P value |
|---------|-------------------------|-------------------------|---------------------|------------------|--------------------------|
|         | ETN+MTX (n=60)          | MTX-TT (n=60)           |                     |                  |                          |
| Week 12 | -31.36 (-37.20, -25.52) | -23.39 (-29.61, -17.17) | 7.97 (-0.58, 16.52) | t=1.83, p=0.068  | F=0.89, p=0.447          |
| Week 24 | -28.92 (-35.15, -22.69) | -25.55 (-32.21, -18.90) | 3.37 (-5.80, 12.53) | t=0.72, p=0.472  |                          |
| Week 48 | -35.37 (-40.87, -29.87) | -34.86 (-40.80, -28.92) | 0.51 (-7.64, 8.66)  | t=0.12, p=0.902  |                          |
| Week 96 | -33.88 (-39.91, -27.85) | -27.67 (-34.63, -20.71) | 6.21 (-3.00, 15.42) | t=1.32, p=0.186  |                          |

Means estimated following multiple imputation. CI=Confidence interval

**Table S21: Secondary outcome Rheumatoid Arthritis Quality of Life (RAQoL) questionnaire**

Population: Full analysis set

| Visit   | Mean change (95% CI)  |                       | Difference (95% CI) | T value, P value | Overall F value, P value |
|---------|-----------------------|-----------------------|---------------------|------------------|--------------------------|
|         | ETN+MTX (n=60)        | MTX-TT (n=60)         |                     |                  |                          |
| Week 12 | -7.78 (-9.35, -6.22)  | -4.79 (-6.33, -3.25)  | 2.99 (0.79, 5.19)   | t=2.67, p=0.008  | F=2.30, p=0.075          |
| Week 24 | -7.43 (-9.15, -5.71)  | -6.31 (-7.96, -4.65)  | 1.12 (-1.27, 3.51)  | t=0.92, p=0.358  |                          |
| Week 48 | -8.36 (-10.28, -6.43) | -7.90 (-9.77, -6.02)  | 0.46 (-2.23, 3.15)  | t=0.34, p=0.737  |                          |
| Week 96 | -8.21 (-10.13, -6.29) | -8.25 (-10.16, -6.34) | -0.04 (-2.74, 2.66) | t=-0.03, p=0.978 |                          |

Means estimated following multiple imputation. CI=Confidence interval

**Table S22: Secondary outcome Rheumatoid Arthritis Work Instability Scale (RAWIS)**

Population: Full analysis set (subset\*)

| Visit   | Mean change (95% CI)  |                       | Difference (95% CI) | T value, P value | Overall F value, P value |
|---------|-----------------------|-----------------------|---------------------|------------------|--------------------------|
|         | ETN+MTX (n=49)        | MTX-TT (n=39)         |                     |                  |                          |
| Week 12 | -7.34 (-9.50, -5.17)  | -4.32 (-6.62, -2.01)  | 3.02 (-0.13, 6.17)  | t=1.88, p=0.060  | F=1.09, p=0.354          |
| Week 24 | -7.05 (-9.39, -4.70)  | -5.87 (-8.21, -3.53)  | 1.17 (-2.11, 4.45)  | t=0.70, p=0.483  |                          |
| Week 48 | -7.69 (-10.01, -5.37) | -7.50 (-10.14, -4.86) | 0.19 (-3.29, 3.68)  | t=0.11, p=0.914  |                          |
| Week 96 | -7.50 (-9.99, -5.00)  | -7.47 (-10.34, -4.60) | 0.02 (-3.73, 3.77)  | t=0.01, p=0.990  |                          |

Means estimated following multiple imputation. CI=Confidence interval

\*This scale is only validated for use in people who are in paid work therefore this analysis has been restricted to those who reported being in paid work at baseline

**Table S23: Secondary outcome total modified Sharp score (hands and feet)**

Population: Full analysis set

| Visit   | % TSS>0        |               | Estimated median change (95% CI) |                    | Difference* (95% CI) | T value, P value |
|---------|----------------|---------------|----------------------------------|--------------------|----------------------|------------------|
|         | ETN+MTX (n=60) | MTX-TT (n=60) | ETN+MTX (n=60)                   | MTX-TT (n=60)      |                      |                  |
| Week 48 | 49%            | 48%           | 0.20 (-0.34, 0.73)               | 0.21 (-0.40, 0.81) | 0.01 (-0.79, 0.81)   | t=0.03, p=0.980  |
| Week 96 | 54%            | 57%           | 0.36 (-0.26, 0.99)               | 0.60 (-0.11, 1.31) | 0.24 (-0.71, 1.19)   | t=0.50, p=0.621  |

Proportions and medians estimated following multiple imputation. CI=Confidence interval; TSS=Total Sharp score

**Table S24: Secondary outcome total ultrasound erosions**

Population: Full analysis set

| Visit    | Estimated % E>0 |               | Estimated 90th percentile* (95% CI) |                    | Difference (95% CI) | T value, P value |
|----------|-----------------|---------------|-------------------------------------|--------------------|---------------------|------------------|
|          | ETN+MTX (n=60)  | MTX-TT (n=60) | ETN+MTX (n=60)                      | MTX-TT (n=60)      |                     |                  |
| Baseline | 16%             | 12%           | 1.00 (-1.19, 3.19)                  | 1.00 (0.12, 1.88)  |                     |                  |
| Week 12  | 14%             | 9%            | 1.00 (-0.75, 2.75)                  | 0.00 (-1.32, 1.32) | -1.00 (-2.94, 0.94) | t=-1.02, p=0.310 |
| Week 24  | 9%              | 11%           | 0.10 (-2.18, 2.38)                  | 0.48 (-0.79, 1.75) | 0.20 (-2.17, 2.57)  | t=0.17, p=0.867  |
| Week 48  | 11%             | 13%           | 0.38 (-1.65, 2.41)                  | 0.78 (-0.83, 2.39) | 0.02 (-1.91, 1.95)  | t=0.02, p=0.984  |

Proportions and percentiles estimated following multiple imputation. CI=Confidence interval; E=Erosion

\*Median was 0 in both groups at all visits. Unplanned use of 90th percentile instead of median as point of comparison.

**Table S25: Secondary outcome cumulative intramuscular steroid dose**

Population: Full analysis set

| <b>Cumulative steroid dose</b> | <b>All (n=119)</b>            | <b>ETN+MTX (n=59)</b>         | <b>MTX-TT (n=60)</b>          |
|--------------------------------|-------------------------------|-------------------------------|-------------------------------|
| Up to week 48 (uncorrected)    | 240.0 (240.0, 240.0), 120-720 | 240.0 (120.0, 240.0), 120-720 | 240.0 (240.0, 240.0), 120-600 |
| Up to week 48 (corrected*)     | 5.0 ( 5.0, 6.2), 2-18         | 5.0 ( 2.6, 7.5), 2-15         | 5.0 ( 5.0, 7.4), 2-18         |

All results presented as median (binomial 95% confidence interval), range. Note that one patient in ETN+MTX was withdrawn after baseline; this patient has been excluded from this analysis.

\*Per week of follow-up.

**Table S26: Escalation of disease-modifying anti-rheumatic drugs (DMARDs)**

Population: Full analysis set

| Treatment started      | Time interval    | ETN+MTX (n=60) | MTX-TT (n=60) |
|------------------------|------------------|----------------|---------------|
| ETN                    | Before week 12   | 100% (60)      | - (0)         |
|                        | Weeks 12 to 23   | - (0)          | - (0)         |
|                        | Weeks 24 to 47   | - (0)          | 52% (31)      |
|                        | At/after week 48 | - (0)          | 2% (1)        |
| ADA                    | At/after week 48 | 3% (2)         | 2% (1)        |
| ABA                    | At/after week 48 | 2% (1)         | - (0)         |
| ≥2 concurrent csDMARDs | Before week 12   | 2% (1)         | 73% (44)      |
|                        | Weeks 12 to 23   | 2% (1)         | 15% (9)       |
|                        | Weeks 24 to 47   | 2% (1)         | 2% (1)        |
|                        | At/after week 48 | 42% (25)       | 3% (2)        |
| 3 concurrent csDMARDs  | Before week 12   | - (0)          | 72% (43)      |
|                        | Weeks 12 to 23   | - (0)          | 13% (8)       |
|                        | Weeks 24 to 47   | 2% (1)         | 2% (1)        |
|                        | At/after week 48 | 10% (6)        | - (0)         |

Note that the patients in the ETN+MTX arm who were escalated to double or triple conventional synthetic DMARD therapy prior to week 48 had all been withdrawn from study therapy and were being followed-up observationally. Two were withdrawn from ETN due to AEs and received double therapy after cessation of ETN, one was an ETN non-responder and received triple therapy. ABA=abatacept; ADA=adalimumab; ETN=etanercept

**Table S27: Adverse event summary**

Population: Safety population

|                                      | <b>All (n=120;<br/>PY=205.3)</b> | <b>ETN+MTX (n=60;<br/>PY=104.2)</b> | <b>MTX-TT (n=60;<br/>PY=101.1)</b> |
|--------------------------------------|----------------------------------|-------------------------------------|------------------------------------|
| <b>AE</b>                            |                                  |                                     |                                    |
| Total AE, n                          | 946                              | 431                                 | 515                                |
| Unique AE, n                         | 778                              | 360                                 | 418                                |
| AE per 100 PY, n                     | 460.8                            | 413.6                               | 509.6                              |
| Patients with ≥1 AE, n               | 118                              | 58                                  | 60                                 |
| Discontinuation due to AE, % (n)     | 7% (8/120)                       | 8% (5/60)                           | 5% (3/60)                          |
| <b>AE by category</b>                |                                  |                                     |                                    |
| Gastrointestinal, n per 100 PY (n)   | 63.8 (131)                       | 43.2 (45)                           | 85.1 (86)                          |
| General, n per 100 PY (n)            | 43.8 (90)                        | 45.1 (47)                           | 42.5 (43)                          |
| Infections, n per 100 PY (n)         | 163.7 (336)                      | 144.9 (151)                         | 183.1 (185)                        |
| Musculoskeletal, n per 100 PY (n)    | 20.0 (41)                        | 19.2 (20)                           | 20.8 (21)                          |
| Nervous system, n per 100 PY (n)     | 34.1 (70)                        | 29.7 (31)                           | 38.6 (39)                          |
| Respiratory, n per 100 PY (n)        | 29.7 (61)                        | 22.1 (23)                           | 37.6 (38)                          |
| Skin, n per 100 PY (n)               | 29.7 (61)                        | 33.6 (35)                           | 25.7 (26)                          |
| Other, n per 100 PY (n)              | 76.0 (156)                       | 75.8 (79)                           | 76.2 (77)                          |
| <b>AE severity*</b>                  |                                  |                                     |                                    |
| Mild, n per 100 PY (n)               | 264.5 (543)                      | 235.1 (245)                         | 294.9 (298)                        |
| Moderate, n per 100 PY (n)           | 106.7 (219)                      | 101.7 (106)                         | 111.8 (113)                        |
| Severe, n per 100 PY (n)             | 6.3 (13)                         | 5.8 ( 6)                            | 6.9 ( 7)                           |
| Life-threatening, n per 100 PY (n)   | 1.5 ( 3)                         | 2.9 ( 3)                            | 0 (0)                              |
| <b>AE by relation to study drug*</b> |                                  |                                     |                                    |
| Not related, n per 100 PY (n)        | 52.1 (107)                       | 51.8 (54)                           | 52.4 (53)                          |
| Unlikely, n per 100 PY (n)           | 87.2 (179)                       | 72.9 (76)                           | 101.9 (103)                        |
| Possible, n per 100 PY (n)           | 174.9 (359)                      | 155.4 (162)                         | 194.9 (197)                        |
| Probable, n per 100 PY (n)           | 58.0 (119)                       | 56.6 (59)                           | 59.4 (60)                          |
| Definite, n per 100 PY (n)           | 6.3 (13)                         | 8.6 ( 9)                            | 4.0 ( 4)                           |
| <b>SAE</b>                           |                                  |                                     |                                    |
| Total SAE, n                         | 14                               | 9                                   | 5                                  |
| SAE per 100 PY, n                    | 6.8                              | 8.6                                 | 4.9                                |
| Patients with ≥1 SAE, n              | 12                               | 7                                   | 5                                  |

PY=Patient years

\*Recurrent AEs counted once at maximum severity/relation reported.

**Figure S1: DAS28ESR plotted over time within subgroups defined according to DAS28ESR remission (<2.6) status at week 24**

Solid lines indicate ETN+MTX; dashed lines indicate MTX-TT. Green lines indicate those in remission at week 24; red lines indicate those not in remission at week 24. In figure S1b the ETN+MTX arm has also been split according to whether patients had DAS28ESR<2.6 (ETN+MTXa) or DAS28ESR≥2.6 (ETN+MTXb) at 24 weeks.

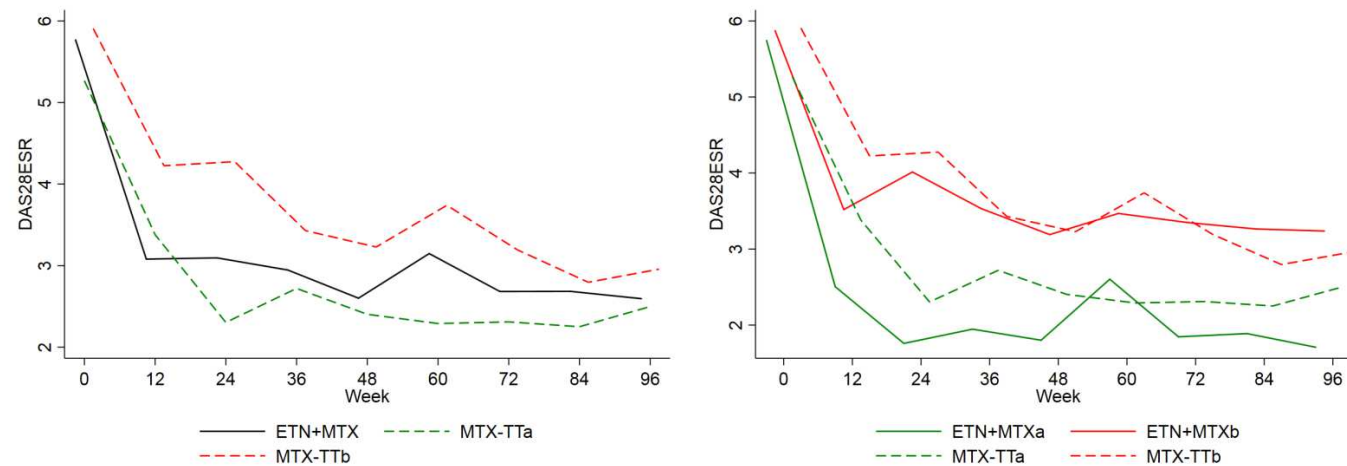



**Figure S2: Cumulative probability plot of total van der Heijde-modified Sharp score at baseline and week 48**

Population: Full analysis set (available case only)

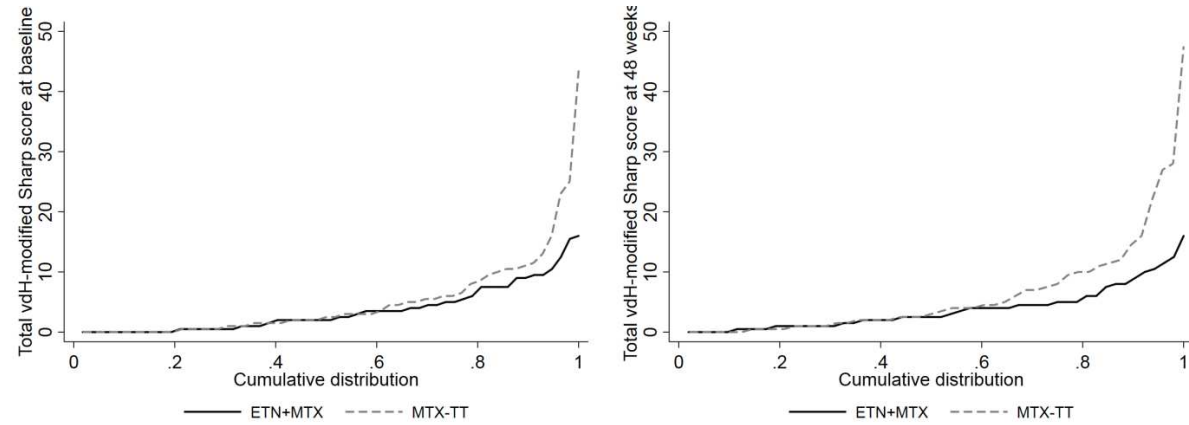

**Figure S3: Cumulative probability plot of ultrasound grey scale score at baseline and week 48**

Population: Full analysis set (available case only)

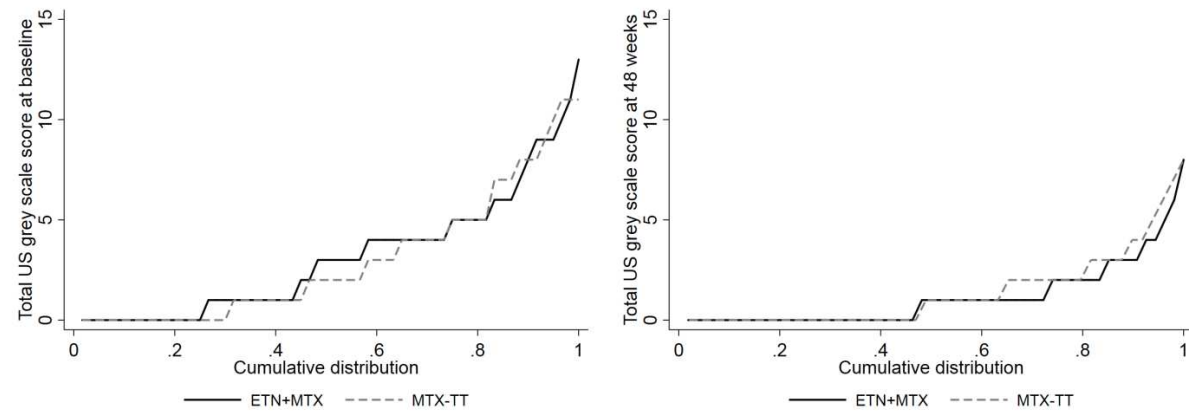

**Figure S4: Cumulative probability plot of ultrasound power Doppler score at baseline and week 48**

Population: Full analysis set (available case only)

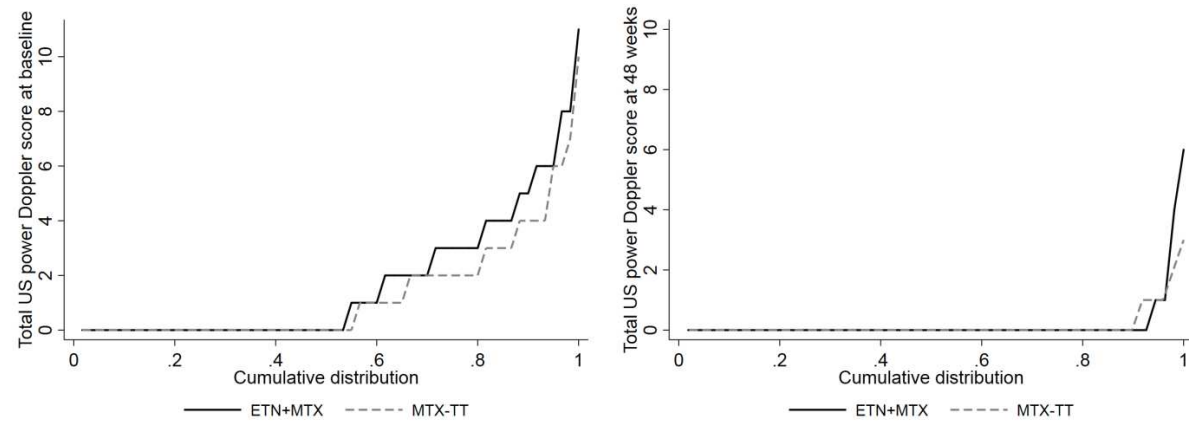

**Figure S5: Cumulative probability plot of ultrasound erosion score at baseline and week 48**

Population: Full analysis set (available case only)

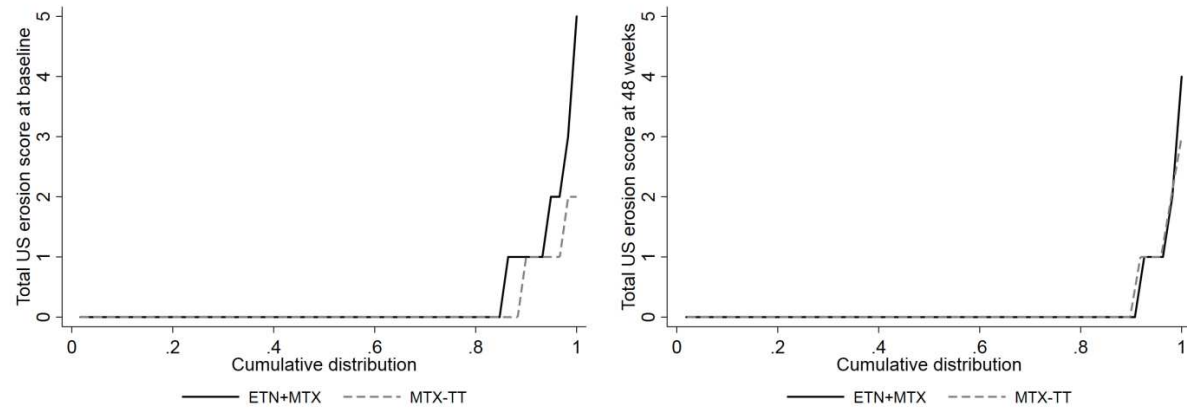

### Figure S6: DAS28 components and early morning stiffness plotted over time (unplanned analysis)

Population: Full analysis set (available case only)

Medians in the ETN+MTX and MTX-TT arms plotted over time for a) TJC28 b) SJC28 c) Erythrocyte sedimentation rate (ESR) d) C-reactive protein (CRP) e) patient disease activity visual analogue scale (VASDA) f) early morning stiffness.

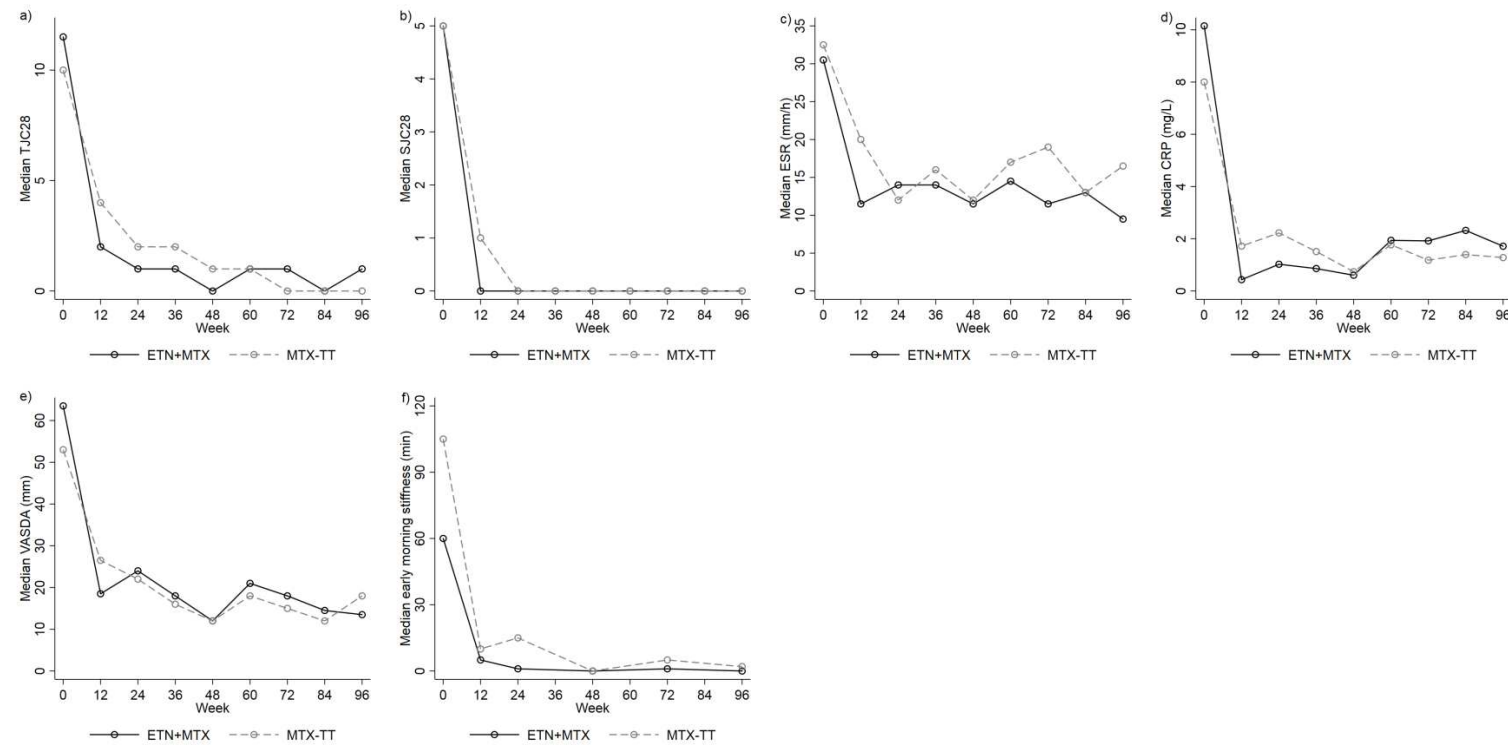

**Figure S7: Different DAS28 definitions plotted over time (unplanned analysis)**

Population: Full analysis set (available case only)

Medians in the ETN+MTX and MTX-TT arms plotted over time for a) DAS28ESR (objective components;  $[0.28 \times \text{sqrtSJC28}] + [0.70 \times \ln(\text{ESR})]$ ) b) DAS28CRP (objective components;  $[0.28 \times \text{sqrtSJC28}] + [0.36 \times \ln(\text{CRP}+1)] + 0.96$ ) c) DAS28 (subjective components;  $[0.56 \times \text{sqrtTJC28}] + [0.014 \times \text{patient disease activity visual analogue scale}]$ ) d) Four component DAS28ESR e) Four component DAS28CRP f) Two component DAS28CRP.

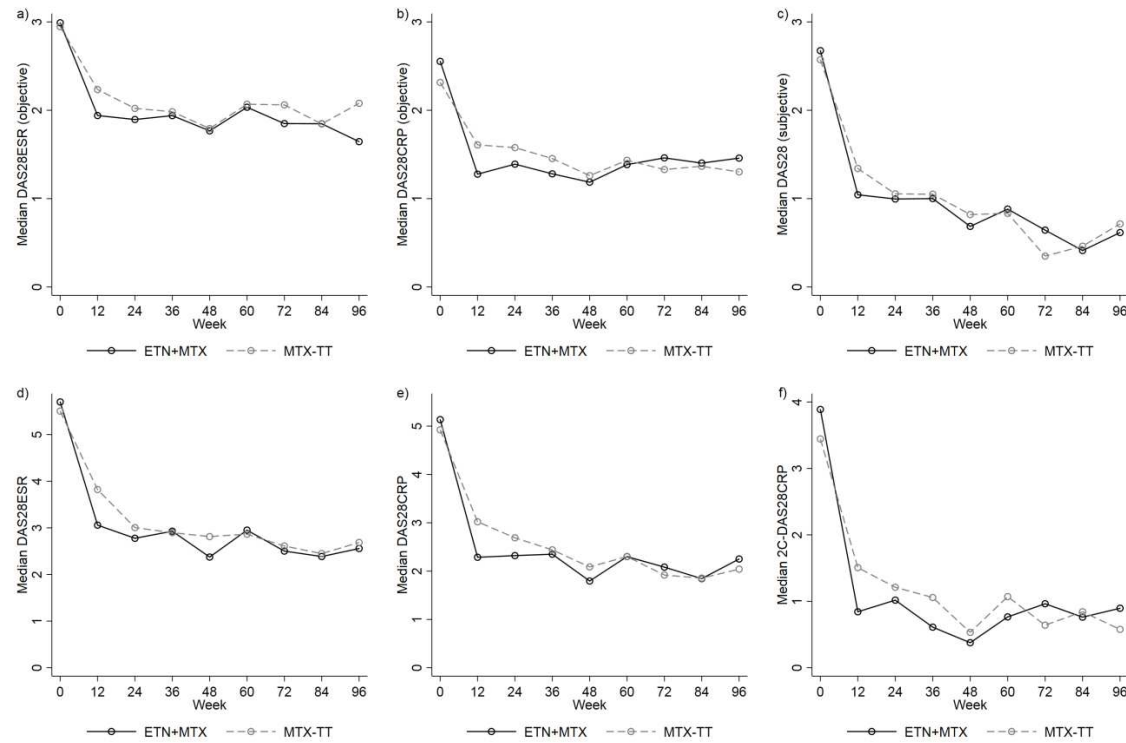

Supplement: annrheumdis-2019-216539supp001.pdf [file annrheumdis-2019-216539supp001.pdf]
